# Supplementary material for: Soft colloidal monolayers with reflection symmetry through confined drying
Source: Royal Society of Chemistry journal article supplement (doi:10.1039/d4na00542b), 2024-01-01
Supplement: d4na00542b1.pdf [file d4na00542b1.pdf]

## Supplementary information

### Soft colloidal monolayer with reflection symmetry through confined drying

Sanjib Majumder,<sup>a,c</sup> Madivala G. Basavaraj,<sup>b,c,\*</sup> and Dillip K. Satapathy<sup>a,c,\*</sup>

<sup>a</sup>Soft Materials Laboratory, Department of Physics, IIT Madras, Chennai-600036, Tamil Nadu, India

<sup>b</sup>PECS Lab, Department of Chemical Engineering, IIT Madras, Chennai-600036, Tamil Nadu, India

<sup>c</sup>Center for Soft and Biological Matter, IIT Madras, Chennai-600036, Tamil Nadu, India

E-mail: basa@iitm.ac.in

E-mail: dks@iitm.ac.in

### Deposit pattern formed by drying dispersion drop under parallel plate confinement

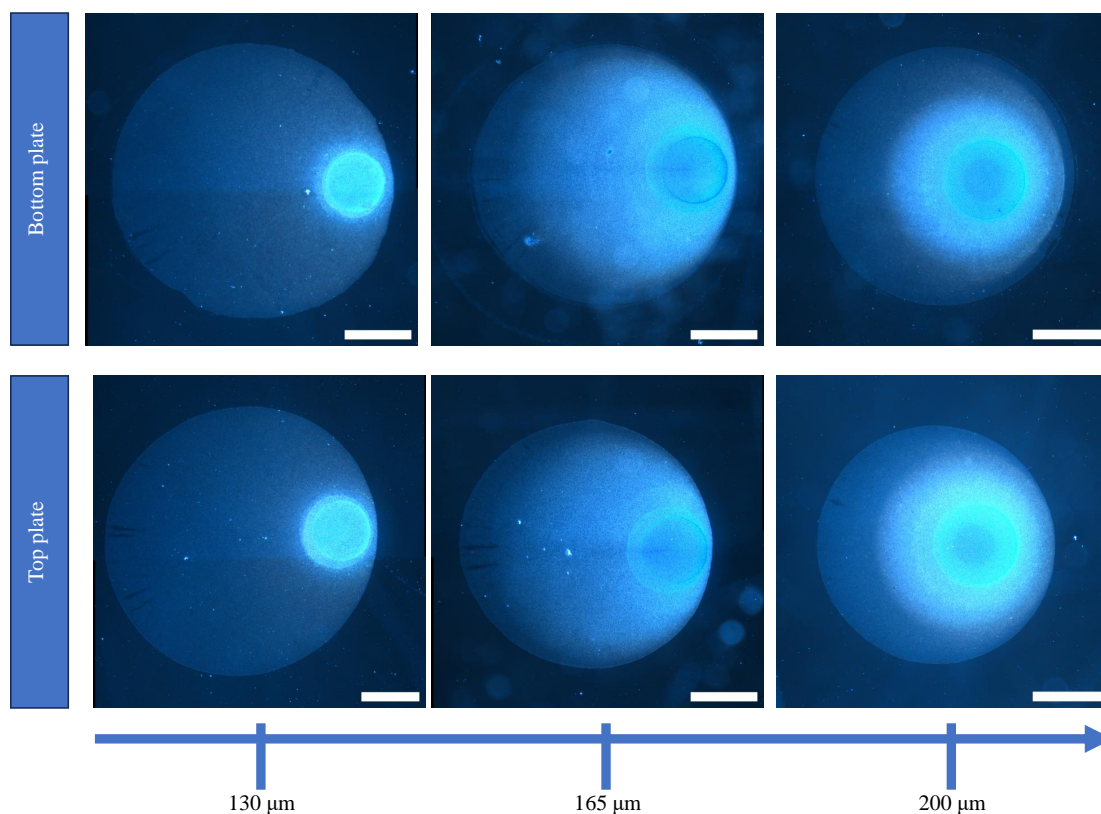

Figure S1: Dark field microscopy images of the deposits formed by drying aqueous drops containing PNIPAM particles under parallel plate confinement. Microscopy images at the upper panel a1, a2 and a3 correspond to the deposits formed on the bottom plate and b1, b2, and b3 at the lower panel correspond to the deposits formed on the top plate of the parallel plate configuration for three different spacings 130  $\mu\text{m}$ , 165  $\mu\text{m}$ , and 200  $\mu\text{m}$ , respectively, for a particular concentration  $C_{ML}$ . All scale bars correspond to 500  $\mu\text{m}$ .

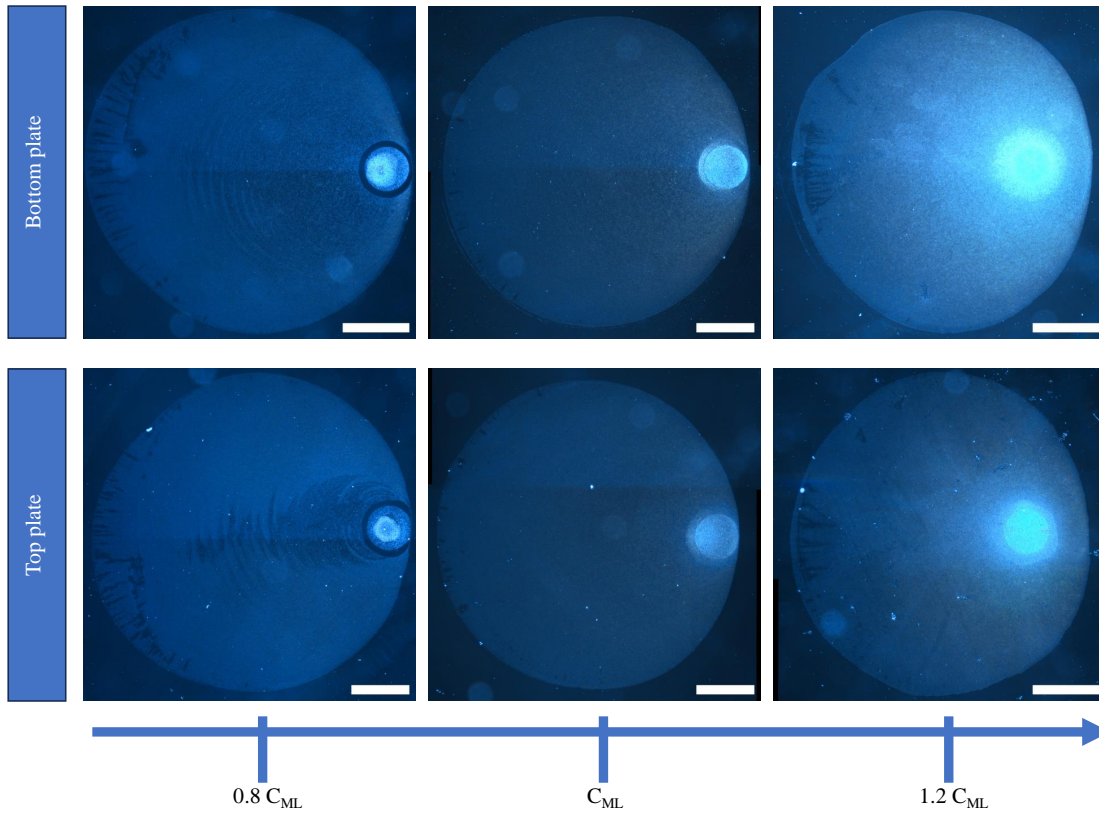

Figure 2: Dark field microscopy images of the deposits formed by drying aqueous drops containing PNIPAM particles under parallel plate confinement. Microscopy images at the upper panel a1, a2 and a3 correspond to the deposits formed on the bottom plate and b1, b2, and b3 at the lower panel correspond to the deposits formed on the top plate of the parallel plate configuration for three different concentrations  $0.8 C_{ML}$ ,  $C_{ML}$ , and  $1.2 C_{ML}$ , respectively, for a particular spacing of  $110 \mu\text{m}$  between the two plates. All scale bars correspond to  $500 \mu\text{m}$ .

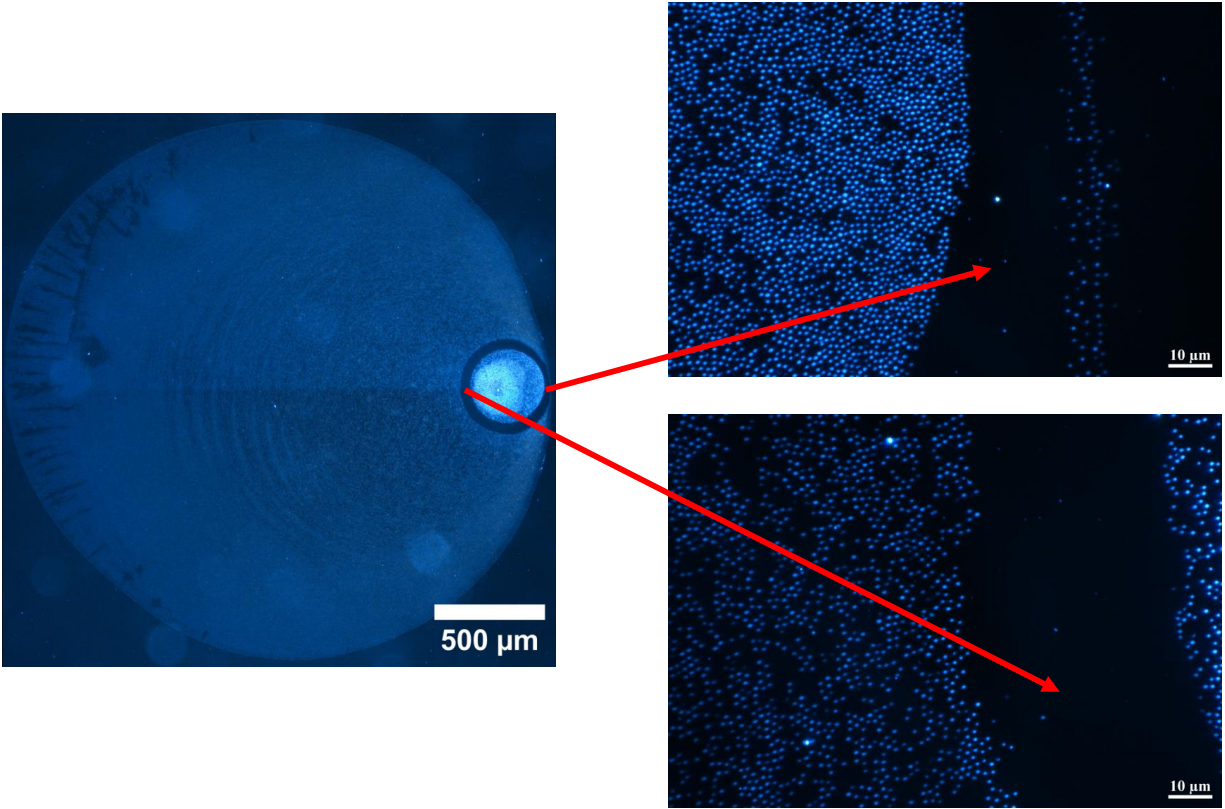

Figure 3: Dark field microscopy images of the deposits formed by drying aqueous drops containing PNIPAM particles of  $0.8 C_{ML}$  concentration under parallel plate confinement with a spacing of  $110 \mu\text{m}$  between the two plates. The annular region surrounding the interior bright circular disc region is depleted of particles
